# Supplementary material for: The Effects of Antipsychotic Treatment on Presynaptic Dopamine Synthesis Capacity in First-Episode Psychosis: A Positron Emission Tomography Study
Source: PubMed Central journal article supplement (PMC6269123; doi:10.1016/j.biopsych.2018.07.003), 2018-07-11
Supplement: mmc1.pdf [file mmc1.pdf]

**The Effects of Antipsychotic Treatment on Presynaptic  
Dopamine Synthesis Capacity in First Episode Psychosis:  
A Positron Emission Tomography Study**

**Supplemental Information**

**Supplementary Table S1. Psychotropic medication received**

---

**Patients who were adherent to  
antipsychotic treatment, N=17**

**Medication**

---

Amisulpride, N=6

Amisulpride and Aripiprazole, N=1

Amisulpride then Quetiapine, N=1

Aripiprazole, N=2

Aripiprazole then Quetiapine, N=1

Olanzapine and Aripiprazole, N=1

Quetiapine, N=2

Lurasidone, N=1

Risperidone, N=1

Risperidone and Aripiprazole, N=1

---

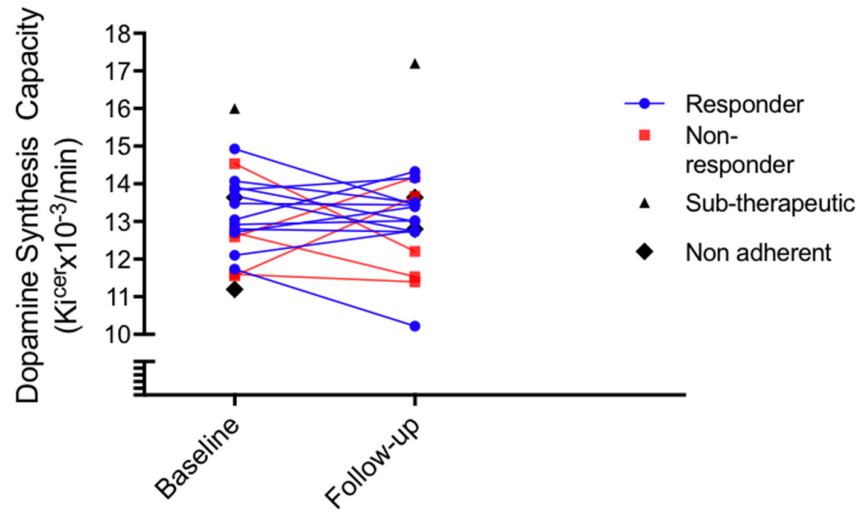

**Supplemental Figure S1. Scatterplot of whole striatal K<sup>icer</sup> values at baseline and at follow-up.**
